# Supplementary material for: Prevalence of Anxiety in COPD Patients. Usefulness of the HADS Test for Establishing the Diagnostic Suspicion of Anxiety Through the Collaboration Between Primary Care, Pulmonology, and Psychiatry Services
Source: Preprints.org preprint supplement (doi:10.20944/preprints202406.0732.v2), 2024-06-13
Supplement: Supplementary file 1 [file supplementary]

**DICTAMEN DEL COMITE DE ETICA DE LA INVESTIGACION CON MEDICAMENTOS DEL AREA  
DE SALUD DE SALAMANCA,**

Dña. M<sup>a</sup> Belén Vidriales Vicente, Secretaria Técnica del Comité de Ética de la Investigación con  
medicamentos del Área de Salud de Salamanca,

**C E R T I F I C A**

Que el Proyecto de Investigación titulado

**PREVALENCIA DE ANSIEDAD Y DEPRESIÓN EN PACIENTES CON EPOC**

Código CEIm: PI 2020 03 455

del que es Investigador Principal: Don Miguel Barrueco Ferrero

del Servicio de Neumología

Se ajusta a las normas éticas, legales y son correctos los aspectos metodológicos, por lo que  
esta secretaría

INFORMA FAVORABLEMENTE para la realización de dicho estudio.

Y para que conste, lo firma en Salamanca con fecha 11 de marzo de 2020

LA SECRETARIA

Fdo.: Dra.. Dña. M<sup>a</sup> Belén Vidriales Vicente
